# 1 Habitat degradation homogenizes ecological responses to 2 typhoons across a subtropical island

3 Samuel R.P.-J. Ross<sup>1,2\*</sup>, Nicholas R. Friedman<sup>3,4</sup>, David W. Armitage<sup>1</sup>, Kenneth L. Dudley<sup>3</sup>,  
4 Takuma Yoshida<sup>5</sup>, Masashi Yoshimura<sup>5</sup>, Evan P. Economo<sup>6</sup>, Ian Donohue<sup>2</sup>

5  
6 <sup>1</sup>Integrative Community Ecology Unit, Okinawa Institute of Science and Technology Graduate  
7 University, Tancha, Onna-son, Okinawa, Japan.

8 <sup>2</sup>Zoology, School of Natural Sciences, Trinity College Dublin, Dublin, Ireland.

9 <sup>3</sup>Environmental Informatics Section, Okinawa Institute of Science and Technology Graduate  
10 University, Tancha, Onna-son, Okinawa, Japan.

11 <sup>4</sup>Centre for Taxonomy and Morphology, Leibniz Institute for the Analysis of Biodiversity Change,  
12 Hamburg, Germany.

13 <sup>5</sup>Environmental Science Section, Okinawa Institute of Science and Technology Graduate University,  
14 Tancha, Onna-son, Okinawa, Japan.

15 <sup>6</sup>Biodiversity & Biocomplexity Unit, Okinawa Institute of Science and Technology Graduate University,  
16 Tancha, Onna-son, Okinawa, Japan.

17  
18 **\*Correspondence:** Samuel RP-J Ross, Integrative Community Ecology Unit, Okinawa Institute of  
19 Science and Technology Graduate University, Okinawa, Japan. E: [s.ross.res@outlook.com](mailto:s.ross.res@outlook.com)

20  
21 **CRedit Author Contribution Statement | SRP-JR:** Conceptualisation, Methodology, Software, Validation,  
22 Formal analysis, Investigation, Writing – Original Draft, Visualisation, Funding Acquisition; **NRF:**  
23 Conceptualisation, Software, Resources, Data Curation, Writing – Reviewing & Editing, Project  
24 Administration; **DWA:** Methodology, Software, Formal Analysis, Writing – Reviewing & Editing; **KLD:**  
25 Software, Validation, Resources, Data Curation, Visualisation, Project Administration; **TY:** Resources,  
26 Data Curation, Project Administration; **MY:** Resources, Data Curation, Project Administration; **EPE:**  
27 Resources, Data Curation, Writing – Reviewing & Editing, Project Administration, Funding Acquisition;  
28 **ID:** Conceptualisation, Methodology, Writing – Original Draft.

29  
30 **Running title:** Typhoon-induced spatial ecological divergence

31 **Key words:** Soundscape, passive acoustic monitoring, extreme weather event, ecological stability,  
32 spatial variability, disturbance, acoustic indices, Okinawa

33

34

## 35 **Abstract**

36 Climate change is increasing the frequency, intensity, and duration of extreme weather events across  
37 the globe. Understanding the capacity for ecological communities to withstand and recover from such  
38 events is critical. Typhoons are extreme weather events that are expected to broadly homogenise  
39 ecosystems through structural damage to vegetation and longer-term effects of salinization. Given  
40 their unpredictable nature, monitoring ecological responses to typhoons is challenging, particularly  
41 for mobile animals such as birds. Here, we report spatially variable ecological responses to typhoons  
42 across terrestrial landscapes. Using a high temporal resolution passive acoustic monitoring network  
43 across 24 sites on the subtropical island of Okinawa, Japan, we found that typhoons elicit divergent  
44 ecological responses among Okinawa's pristine forests, as indicated by increased spatial variability of  
45 biological sound production (biophony) among forested sites. However, no such post-typhoon shift in  
46 variability was observed among developed urban or agricultural sites. This indicates that natural  
47 forests have a diversity of pathways through which communities can respond to typhoons, whereas  
48 land use development produces communities more constrained in their disturbance responses. That  
49 is, spatial insurance effects among forest communities may provide resilience to typhoons at the  
50 landscape scale, but this spatial insurance was diminished by habitat degradation through land use  
51 development. Though site-level typhoon impacts on soundscapes and bird detections were not  
52 particularly strong, we nevertheless revealed spatial heterogeneity in typhoon responses, owing to  
53 the data resolution afforded to us by monitoring at scale (high temporal resolution, broad spatial  
54 extent). Our findings underscore the importance of natural forests in insuring ecosystems against  
55 disturbance, and demonstrate the potential of landscape-scale acoustic sensor networks for  
56 documenting the understudied ecological impacts of unpredictable extreme weather events.

57

## 58 **Introduction**

59 Climate change is increasing both the frequency and destructive potential of extreme  
60 weather events such as typhoons (Bhatia et al., 2019; Emanuel, 2005; Kossin et al., 2020; Li &  
61 Chakraborty, 2020). Typhoons bring exceptional winds and rainfall and can cause structural damage  
62 to terrestrial habitats through wind-damage (Everham & Brokaw, 1996), flooding (Gardner et al.,  
63 1991), and salinization by sea spray, particularly on islands (Elliott & Nino, 1960; Kerr, 2000). These  
64 destructive forces can impact the mortality, composition, and dynamics of trees (Lin et al., 2020;  
65 Morimoto et al., 2021), birds (Cely, 1991; Chevalier et al., 2019; Seki, 2005), bacteria (Ares et al.,  
66 2020), invertebrates (Azuma et al., 1997; Willig & Camilo, 1991), and other animals (Donihue et al.,  
67 2018; Pavelka et al., 2007; Testard et al., 2021).

68 Land cover may affect exposure to—and hence the ecological consequences of—extreme  
69 weather events (Laurance, 1998). Several studies suggest that primary forest with a mix of vegetation  
70 types and life forms is most likely to resist and recover from typhoon disturbance (Abbas et al., 2020;  
71 Zampieri et al., 2020). Human activity and associated land use change has, therefore, considerable  
72 potential to modify the severity and reach of typhoons (Raymond et al., 2020). For example, land  
73 abandonment might be expected to dampen the effects of typhoons over time as intensively  
74 managed agricultural areas undergo natural succession to a more biologically and structurally diverse  
75 system, whereas deforestation through urbanisation or agricultural intensification should increase  
76 typhoon exposure (via loss of canopy structure) as well as subjecting ecological communities to the  
77 stressors and pollutants associated with these anthropogenic land uses (Daskalova et al., 2020;  
78 Senzaki et al., 2020; Sirami et al., 2008; Uchida & Ushimaru, 2014). Yet, despite the potential for land  
79 cover to moderate the impact of extreme events, the practical difficulties associated with ecological  
80 monitoring at scale have, to date, limited understanding of the extent of any differential impacts of  
81 typhoons across habitat types and of the consequences of such differences for landscape-scale  
82 biodiversity or spatial processes such as metacommunity dynamics and stability (Loreau et al., 2003;  
83 Wang et al., 2021).

84 Ecological stability is a central framework for considering disturbance impacts across spatial,  
85 temporal, and organisational scales, from populations to ecosystems (Hillebrand et al., 2018; Kéfi et  
86 al., 2019). Stability is a concept with multiple dimensions (Donohue et al., 2013; Hillebrand et al.,  
87 2018; Pimm, 1984), including components such as resistance to and recovery from disturbance (Baert  
88 et al., 2016; Yang et al., 2019), and the variability of ecological variables both in time and space  
89 (Tilman et al., 2006; Wang et al., 2017). Both disturbance events and ecological responses to such  
90 events vary across spatiotemporal scales (Clark et al., 2021; Ross et al., 2021b; Zelnik et al., 2018).  
91 This necessitates high-resolution and long-term monitoring of ecosystems to holistically capture the  
92 ecological impacts of infrequent extreme events such as typhoons. However, monitoring biodiversity  
93 over large spatial and temporal scales poses considerable logistical and financial challenges.  
94 Accordingly, most empirical studies of ecological stability are experimental (Kéfi et al., 2019), while  
95 observational studies of disturbance typically employ space-for-time substitutions (Butsic et al.,  
96 2017), or consider only single-time snapshots before and after disturbance (*e.g.*, Burivalova et al.,  
97 2014). In such cases, it is extremely challenging to isolate the relevant pathways through which  
98 disturbance events impact ecosystems in a holistic multidimensional way.

99 Recent advances in automation hold promise for understanding disturbance responses  
100 through large-scale continuous monitoring of biodiversity (Keitt & Abelson, 2021; Ross et al., 2023).  
101 Following developments in data acquisition, storage, and processing, passive acoustic monitoring of

102 wildlife and soundscapes is growing in popularity (Burivalova et al., 2019; Gibb et al., 2019). As sensor  
103 networks are established to collect acoustic data autonomously (Keitt & Abelson, 2021; Sethi et al.,  
104 2020), a diverse range of ecological studies become tractable by leveraging high-resolution acoustic  
105 time series (*e.g.*, Deichmann et al., 2018; Lomolino et al., 2015; Rossi et al., 2017; Sueur et al., 2019;  
106 Ross et al., 2023). Studies of disturbance impacts on *soundscapes*—that is, all sound produced in an  
107 ecosystem (Pijanowski et al., 2011a, 2011b), including *biophony* (biotic sound), *geophony* (natural  
108 abiotic sound, such as rain), and *anthropophony* (human-related sound)—have recently emerged,  
109 though most commonly still make before-and-after or space-for-time comparisons (*e.g.*, Deichmann  
110 et al., 2017; Gasc et al., 2018). However, the high-resolution time series afforded by passive acoustic  
111 monitoring allows opportunistic measurement of soundscape responses to infrequent disturbance  
112 events, such as typhoons (*e.g.*, Gottesman et al., 2021), as well as documenting longer-term trends  
113 under climate change (Sueur et al., 2019). Acoustic monitoring thus provides an opportunity to  
114 overcome many of the challenges associated with studying extreme weather events, by allowing pre-  
115 and post-typhoon comparisons (Altwegg et al., 2017; Rajan et al., 2022), and capturing ecological  
116 responses to typhoons across scales in space and time (Lin et al., 2020) using a multidimensional  
117 stability framework (Donohue et al., 2013). Of the few studies that have used acoustic monitoring to  
118 capture storms or extreme events, most focused on marine soundscapes (Boyd et al., 2021; Locascio  
119 & Mann, 2005; Simmons et al., 2021), though Gottesman *et al.* (2021) recently showed that terrestrial  
120 soundscapes were less resistant than those of coral reefs to hurricane disturbance. Embedded within  
121 terrestrial soundscapes, bird vocalisations provide the opportunity to assess the impact of typhoons  
122 on critical indicator taxa (Gasc et al., 2017), while acoustic indices provide rapid information on a  
123 combination of biodiversity and other meaningful aspects of soundscape change (Bradfer-Lawrence  
124 et al., 2020; Harris et al., 2016; Rajan et al., 2022). There are, however, few studies that  
125 simultaneously assess both individual species vocalisations and acoustic indices explicitly (Ferreira et  
126 al., 2018; Ross et al., 2018).

127         Here, we exploit a dataset that is, to our knowledge, the highest-resolution dataset recording  
128 biological responses to an extreme weather event to date, capturing daily bird vocalisations and half-  
129 hourly acoustic indices in response to two large typhoons across 24 field sites on the island of  
130 Okinawa, Japan. We measure multiple dimensions of ecological stability for both soundscapes and  
131 individual bird species in response to a super-typhoon in September 2018, which was followed five  
132 days later by an extratropical cyclone. Our study spans Okinawa’s full range of terrestrial habitats,  
133 allowing us to examine how land use can shape ecological responses to extreme events. Given that  
134 organisms are differently vulnerable to mortality and mechanical damage resulting from typhoons

135 (Abbas et al., 2020; Zampieri et al., 2020), we expect land use to influence typhoon responses  
136 (Raymond et al., 2020).

137           Specifically, we test the hypotheses that typhoons (1) temporarily reduce soundscape  
138 richness and (2) bird vocalisation rates, and (3) homogenise soundscapes across sites. We also predict  
139 that (4) natural forest habitats should have soundscapes that are more resistant to typhoons owing to  
140 their closed canopy structure (Abbas et al., 2020; Nimmo et al., 2016). We expect to find differences  
141 in bird species responses to typhoons, perhaps as a function of their traits (Wiley & Wunderle, 1993).  
142 Closed canopy specialists, frugivores, granivores, and nectarivores should be most vulnerable to food  
143 resource losses following typhoons (Chevalier et al., 2019; Wiley & Wunderle, 1993; Zhang et al.,  
144 2016), while insectivores may benefit from increased access to prey in canopy gaps (Cely, 1991; Seki,  
145 2005), and large-bodied or predatory birds may be especially vulnerable to typhoon-induced habitat  
146 alteration, owing to their dependence on prey availability and habitat area (*e.g.*, Ross et al., 2019) and  
147 their slow reproductive rates (Cely, 1991; Cohen et al., 2021; Wiley & Wunderle, 1993). These  
148 hypotheses draw on the idea that forest loss is a key catalyst of biodiversity change (Daskalova et al.,  
149 2020; Gibson et al., 2011). This is especially pertinent given the high richness and rates of endemism  
150 and specialism among Okinawa's forest taxa (Inoue et al., 2019; Itô et al., 2000). Okinawa island is  
151 subject to rapid and ongoing land use change, particularly through deforestation for urbanisation and  
152 agricultural intensification (Ross et al., 2018; Takeuchi et al., 1981). Such land use change necessitates  
153 an explicit focus on habitat degradation as a driver of the ecological outcomes of intensifying natural  
154 disturbance regimes under climate change, including an increase in the frequency and destructive  
155 potential of typhoons and extreme storms around Okinawa (A. Iwasaki, unpublished data).

156

## 157 **Methods**

### 158 *Study sites and typhoon impact*

159           This study uses data from the OKEON (Okinawa Environmental Observation Network)  
160 Churamori Project (OKEON 美ら森プロジェクト; <https://okeon.unit.oist.jp/>) in Okinawa, Japan. We  
161 use data from OKEON's 24 field sites across the island of Okinawa, representing Okinawa's full range  
162 of land cover types (Figure 1). Elsewhere, we describe the geographic variation among the sites (Ross  
163 *et al.*, 2018), which were assessed using reflectance estimates from Landsat 8 images to estimate  
164 proportional land cover for various land cover classes within a 1,000 m circular buffer surrounding  
165 each site, an appropriate scale for detecting land cover effects on highly mobile taxa such as birds.  
166 We classified land cover into the following categories: dense closed-canopy forest; grassland and  
167 scrubland (that is, low-medium growth coastal and disturbed vegetation, and managed grasses);  
168 agricultural land (primarily for sugarcane); urban areas characterised by materials such as asphalt and

169 concrete with limited vegetation; sand and dirt with limited vegetation; freshwater bodies; and  
170 miscellaneous land cover not described in the above categories. To deal with the challenge of  
171 multicollinearity among land cover classes, we used an unsupervised learning approach to identify  
172 clusters of sites with similar land cover. We used k-means clustering (optimal  $k = 2$  clusters) to identify  
173 sites that clearly differentiated in Principal Component Analysis (PCA) space, where the first PCA axis  
174 captured Okinawa's primary land use gradient and explained 81.2% of the variance among our sites  
175 (Supplementary Figure S1). The PCA loadings show that the two clusters identified represent a  
176 distinction between sites that are primarily forested and those that are either agricultural or urban  
177 (Figures 1b and S1), hereafter together referred to as 'developed' sites.

178 Acoustic data has been collected at each OKEON site since February 2017, but here we focus  
179 on a 66-day period in 2018 surrounding the landfall of two large typhoons, Trami and Kong-Rey. Trami  
180 passed closest to Okinawa on 29 September 2018 and was followed closely by Kong-Rey on 4 October  
181 2018 (Japan Meteorological Agency [JMA] 2018; Figure 1a). We isolated recordings from the 30-day  
182 periods before (*pre-disturbance* period: 30 August – 28 September 2018) and after (*post-disturbance*  
183 period: 06 Oct – 04 Nov 2018) the typhoons made landfall, comprising a total of 771,840 minutes of  
184 data (Figure 1). Okinawa and the Ryukyu archipelago are increasingly exposed to more frequent and  
185 intense typhoons (A. Iwasaki, unpublished data), with annual typhoon seasons bringing disturbance  
186 events of varying magnitude (Elliott & Nino, 1960). Typhoon Trami was the largest typhoon (tropical  
187 cyclone) to hit Okinawa since OKEON acoustic recording began, with windspeeds reaching  $183 \text{ km h}^{-1}$   
188 on 29 September 2018 (JMA 2018). Trami was followed shortly after by Kong-Rey, which was less  
189 severe, striking Okinawa as an extratropical cyclone (JMA 2018). The chosen acoustic recordings  
190 therefore include a well-characterised pre-disturbance state (Ross et al., 2018, 2021a), followed by an  
191 extreme weather event and post-disturbance period during which soundscapes could potentially  
192 recover to their pre-disturbance state (Figures 1c and 1d).

193

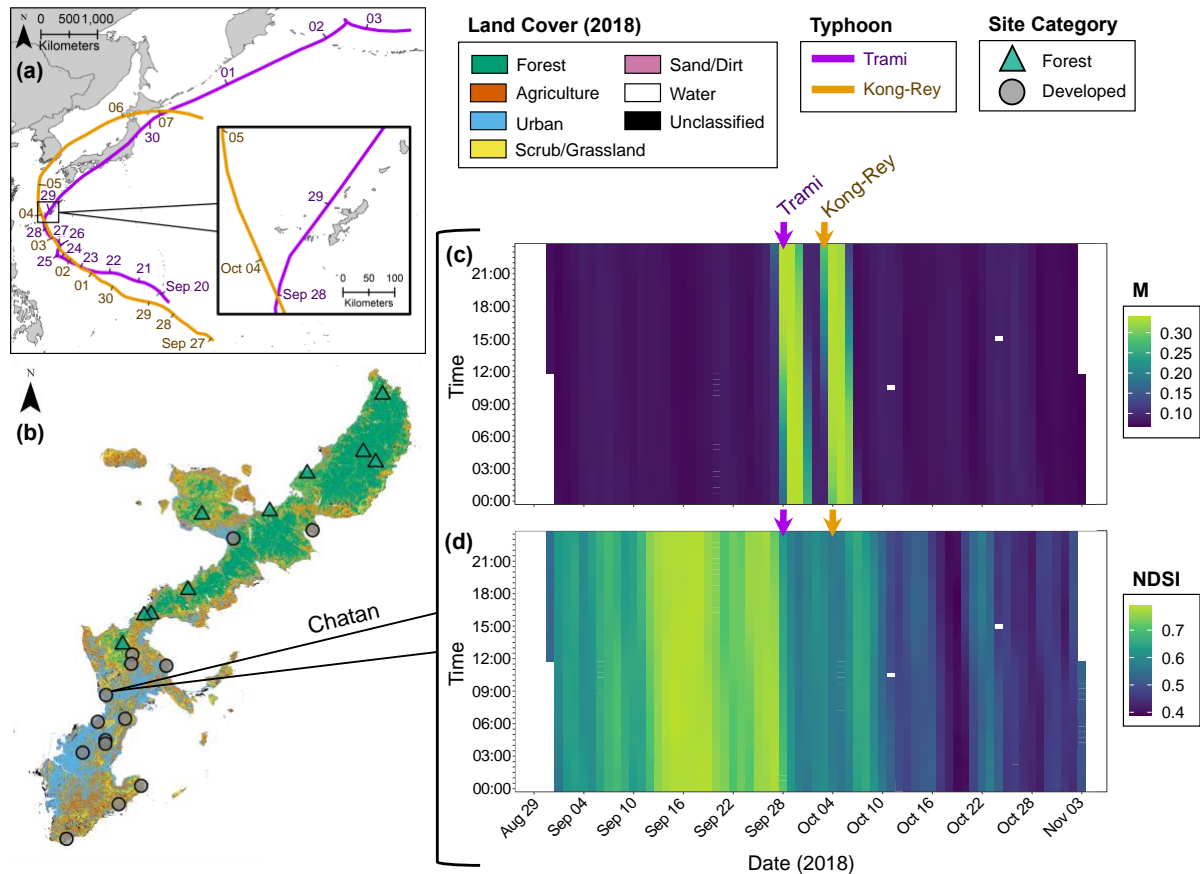

194

195 **Figure 1. Field sites, timeline, and typhoon impact.** (a) Map showing the tracks (coloured lines) of two large  
 196 typhoons that hit Okinawa: super typhoon Trami in orange (20 Sep-03 Oct 2018; closest pass on 29 Sep 2018)  
 197 and extratropical cyclone Kong-Rey in purple (27 Sep-07 Oct 2018; closest pass on 04 Oct 2018). (b) Map of  
 198 Okinawa, including different land cover classifications based on a Landsat 8 image from 2018 (see Ross *et al.*,  
 199 2018 for details). 24 Field sites with acoustic recorders are marked with coloured points; green triangles are  
 200 sites grouped in the forested site cluster ( $n = 10$ ), and grey circles those in the developed cluster ( $n = 14$ ) based  
 201 on unsupervised  $k$ -means clustering of land cover variables (see *Methods*). (c-d) illustrative example time series  
 202 of the study period at the developed Chatan field site (see b), showing the dates of the typhoon arrival (marked  
 203 with coloured arrows) and the 30-day periods preceding and following typhoon impact. Dates along the X-axis  
 204 span the full study period (30 Aug-04 Nov), and times along the Y-axis span 00:00-23:30 in half-hour intervals).  
 205 Each grid cell then represents the value of a detrended and normalised acoustic index for the 10-minute  
 206 recording corresponding to each time-by-date combination. To illustrate the potential for acoustic indices to  
 207 reveal typhoon impacts, we show c) the median of the amplitude envelope ( $M$ ; see Ross *et al.*, 2021a), where  
 208 higher values (lighter colours) represent louder soundscapes across all frequency bands (Depraetere *et al.*,  
 209 2012), and (d) the normalised difference soundscape index (NDSI), where higher values (lighter colours)  
 210 represent a dominance of biophony in the soundscape, while lower values (darker colours) comprise mostly  
 211 anthropophony (Kasten *et al.*, 2012). Note the signal of the typhoons on the soundscape, clear in (c) as an  
 212 increase in total soundscape volume as the typhoons pass Okinawa, and in (d) as a decline in the relative  
 213 contribution of biophony (lighter colours) to the soundscape following the typhoons, suggesting changes to

214 vocalisation behaviour and possible mortality in the wake of typhoon impact. Geophony such as the heavy wind  
215 and rain caused by typhoons typically produces broadband sound, so does not produce a clear signal in (d),  
216 unlike in (c).

217

### 218 *Acoustic monitoring and data processing*

219 Song Meter SM4 recorders (Wildlife Acoustics Inc., Concord, MA, USA) are installed at  
220 approximately breast height (~1.3m) at each field site and are programmed to record at default gain  
221 settings (+16 dB) via two omnidirectional microphones on a schedule of 10-minutes recording, 20-  
222 minutes standby, with recording starting on every hour and half hour. Data are saved to an SD card in  
223 stereo .WAV format at a sampling rate of 48-kHz. All audio data collected as part of the OKEON  
224 Churamori Project are archived with the Okinawa Institute of Science and Technology's high-  
225 performance computing centre.

226 For each 10-minute audio file, we computed three commonly used acoustic indices in R  
227 (version 4.2.1; R Core Team 2022) using the *soundecology* package (version 1.3.3; Villanueva-Rivera &  
228 Pijanowski 2018). We calculated the normalised difference soundscape index (NDSI) and its two  
229 component indices, biophony (NDSI<sub>Bio</sub>) and anthropophony (NDSI<sub>Anthro</sub>), by first generating a  
230 spectrogram via fast Fourier transformation (Hanning window size = 256) and splitting it into 1-kHz  
231 frequency bands. Biophony and anthropophony are then calculated as the sum of the amplitude of all  
232 1-kHz bands in, respectively, the 2-11-kHz and 1-2-kHz frequency ranges (Kasten et al., 2012). NDSI is  
233 calculated as the ratio between these two components, such that higher values indicate a larger  
234 proportion of biophony in the soundscape relative to anthropophony; NDSI scales -1 to +1, where -1  
235 indicates complete dominance of anthropophony (low-frequency sound) whereas +1 indicates total  
236 biophony (Kasten et al., 2012). This approach is preferable in our case over the original suggestion to  
237 compare anthropophony with the highest amplitude frequency band from the biophony range  
238 (Kasten et al., 2012), since it provides less weight to anthropophony and a greater focus on biophony  
239 (S. Gage, pers. Comm.), which is important when considering biotic responses to typhoons. Choice of  
240 acoustic indices was determined by previous work in this system showing that our focal indices  
241 generally covary with biodiversity across the range of sonic conditions experienced in Okinawa (Ross  
242 et al., 2021a). To facilitate comparisons among indices across studies, we normalised acoustic index  
243 values before analysis, producing relative proportions by dividing NDSI<sub>Bio</sub> and NDSI<sub>Anthro</sub> each by their  
244 site-specific maximum (Bradfer-Lawrence et al., 2020), and normalising NDSI as (NDSI + 1)/2, since it  
245 ranges -1 and +1 and so cannot be scaled by its maximum to normalise values (Fairbrass et al., 2017).

246 We also used machine learning methods (see Ross et al., 2018) to identify and count  
247 detections of three key focal bird species from our recordings. We used Kaleidoscope Pro (version  
248 5.3.0; Wildlife Acoustics Inc., Concord, MA, USA) to train software recognisers for the large-billed



249 crow (*Corvus macrorhynchos*, ハシブトガラス in Japanese), the Japanese bush warbler (*Horornis*  
250 *diphone*, ウグイス), and the Ryukyu scops-owl (*Otus elegans*, リュウキュウコノハズク). Together,  
251 these species exhibit a range of life histories, habitat affinities, vocal repertoires, and conservation  
252 statuses (Hamao, 2013; Inoue et al., 2019; Itô et al., 2000; McWhirter et al., 1996; Ross et al., 2018),  
253 including a small-ranged forest habitat specialist (*O. elegans*), and are therefore expected to vary in  
254 their sensitivity to typhoons and land cover. Species detection algorithms often transfer poorly across  
255 sites as a result of site-specific differences in background sonic conditions (Ross et al., 2018, 2021a),  
256 but we developed reliable detectors ( $\leq 15\%$  false positives on visual inspection) at 21 sites for *C.*  
257 *macrorhynchos*, 17 sites for *H. diphone*, and 7 of the 10 forest sites for *O. elegans* (Table S1).  
258 Kaleidoscope Pro uses a supervised clustering approach based on Hidden Markov Models to separate  
259 sound types. Local experts cross-checked automated clustering of sound sources and reclassified  
260 sound clusters where necessary to refine species recognisers. Owing to the volume of data used in  
261 this study, we did not calculate exact false positive rates for species detections. Instead, we used  
262 Kaleidoscope Pro's 'distance-from-cluster-centroid' measure to estimate identity confidence; larger  
263 distance values represent detections that are less likely to be the target species. Filtering by distance-  
264 from-centroid then allows rapid removal of low certainty detections. We chose a conservative  
265 distance filter of 0.5, though our results were qualitatively similar under less conservative filters  
266 (Figure S2).

267

### 268 *Analysis of acoustic indices*

269 Before measuring the stability of acoustic indices through time, we detrended the normalised  
270 acoustic index time series using a centred moving average with a three-day window size in the *R*  
271 package *forecast* (version 8.14; Hyndman & Khandakar, 2008). We chose a three-day moving average  
272 because increasing the temporal window size of the moving average function to five or seven days  
273 produced qualitatively similar results at the expense of time series length and dampened soundscape  
274 dynamics (Figure S3). We then measured four components of stability at each site for normalised and  
275 detrended acoustic time series: temporal stability, resistance, recovery time, and spatial variability  
276 (Table S2; Donohue et al., 2013). Temporal stability was calculated as 1 minus the coefficient of  
277 variation (that is, the standard deviation divided by the mean) of the 30-day pre-typhoon period and  
278 the 30-day post-typhoon period, separately. Resistance was the maximum absolute change between  
279 the mean pre-typhoon baseline state and the maximum point of deviation from that state within 48  
280 hours of the second typhoon passing (Hillebrand et al., 2018). Recovery time was 1 minus the time (in  
281 hours) between the point of maximum deviation from baseline (from which resistance was measured)  
282 and the point at which values returned to the pre-typhoon baseline (mean  $\pm$  95% confidence interval)

283 and stayed within them for 24 hours (White et al., 2020), though results were generally robust to  
284 alternative window sizes (Figure S4).

285 We calculated spatial variability from mean values across sites per time point (Table S3).  
286 Higher values of spatial variability among sites represent a greater diversity of potential responses  
287 through asynchronous biomass fluxes within or among species, providing spatial insurance through  
288 patch dynamics (Leibold et al., 2004; Loreau et al., 2003; Wang et al., 2021). To test for potential land  
289 cover effects on spatial variability, we also calculated spatial variability among only those sites  
290 characterised as either forested or developed (Figure S1). To aid comparison, stability components  
291 were normalised by their maximum (0-1) and defined such that larger values represent greater  
292 stability (see Table S2 for detailed explanation of stability components and their interpretation).

293 All analyses were done in *R* (version 4.2.1, R Core Team 2022), using the packages *brms* and  
294 *segmented* (Bürkner, 2017; Muggeo, 2008). We tested for interactive effects of typhoons and land  
295 use on mean acoustic index states and temporal stability of indices, and for land use effects on  
296 acoustic index resistance and recovery time. For these analyses, we fitted generalised linear mixed  
297 effects models, with field site included as a random effect, using Stan (Stan development team 2020),  
298 implemented via the *brm* function in *brms* (Bürkner, 2017). For all four response variables, the  
299 modelled fixed effects included land use category (forest or developed) and typhoon state (pre- or  
300 post-typhoon). Given their nature, resistance and recovery time were not modelled as a function of  
301 typhoon impact. Default Hamiltonian Monte Carlo was used for the MCMC algorithm and all priors  
302 were uninformative. As our response variables fell on the [0,1] scale, we used the Beta model family  
303 with logit link. Model comparisons were made with leave-one-out cross validation (LOOIC)  
304 implemented in *brms* calculated via Pareto-smoothed importance sampling (Vehtari et al., 2017). We  
305 chose models with lowest LOOIC as best performing models (excepting cases where  $\Delta\text{LOOIC} < 4.0$ ,  
306 where model selection favoured the model with fewer parameters), since lower LOOIC indicates  
307 higher predictive accuracy. Four independent MCMC chains were run, each with a warmup phase of  
308 5,000 iterations and sampling phase of 45,000 iterations. We inspected trace plots and density plots  
309 visually for chain mixture and verified convergence using the Gelman-Rubin  $\hat{R} < 1.01$  and effective  
310 sampling size statistics (Gelman & Hill, 2006). We also tested for spatial autocorrelation of model  
311 residuals using the Moran's *I* test statistic for each fitted model (Gittleman & Kot, 1990). Moran's *I*  
312 results were always non-significant (that is, we did not detect significant spatial autocorrelation in any  
313 models), so we report results of the nonspatial models. Results of these models are presented as 95%  
314 highest density intervals (credible intervals) of all chains' posterior parameter draws after the burn-in  
315 period.

316 For models of spatial variability responses, we fitted break-point models of spatial variability  
317 as a function of land use category (forest versus developed) using the *R* package *segmented* (Muggeo,  
318 2008). Break-point models fit segmented relationships between predictor and response variables to  
319 determine whether the form of the relationship changes as a function of the predictor variable. In our  
320 case, we modelled spatial variability as a function of land use category and time, with two fixed break  
321 points specified at the onset of the first typhoon (00:00, 29 Sep 2018), and immediately following the  
322 second typhoon (00:00, 6 Oct 2018), allowing intercepts, but not slopes, to vary. To prevent  
323 overfitting, we constrained models to these two *a priori* break-points. We selected best fitting models  
324 using likelihood ratio tests, where significant ( $p < 0.05$ ) tests indicated a model with break point  
325 parameters and an additional intercept was a significant improvement over one without such  
326 parameters. In all cases where break-point models were selected, we compared spatial variability  
327 values before the first break-point (pre-typhoon) and after the second break-point (post-typhoon) by  
328 comparing the 95% confidence intervals of the pre- and post-typhoon periods; nonoverlapping  
329 confidence intervals suggest a change in spatial variability at the  $p < 0.05$  confidence level.

330

### 331 *Analysis of automated species detections*

332 Given the lower temporal resolution of daily summed time series of bird species detections  
333 (*i.e.*, one value per day rather than 48), we did not estimate resistance or recovery time for bird  
334 species detections. Rather, we focused our analyses on the temporal stability of bird detections for  
335 each species across the 30-day pre- and post-typhoon periods and the spatial variability of detections  
336 per day across all sites, and across sites falling into each land use category (forested versus  
337 developed). Note that the forest specialist *Otus elegans* was not detected in any developed sites  
338 (Table S1), so for this species there is no data subset to compare between land cover types. As  
339 automated species detections produced count data, we did not normalise raw values of bird species  
340 detections.

341 As for acoustic indices, we tested for interactions between land use and typhoon effects on  
342 the mean number of daily detections (mean state) and the temporal stability of daily detections. We  
343 compared species effects by fitting a three-way interaction between species identity, land use, and  
344 typhoon period (two levels: before versus after the typhoons). We specified *brms* models as  
345 described previously, but with lognormal error distributions, which outperformed other error  
346 structures based on LOOIC. To aid convergence, we additionally set weakly informative priors of  
347  $N(0,2)$  for all predictor variables in both models, but otherwise opted for uninformative priors. For  
348 spatial variability, we fit break-point models of a three-way interaction between species identity, land  
349 use, and typhoon effects, with two fixed break points delineating the typhoon period as described

350 above. We evaluated the suitability of fitting break-point models by comparing break-point models  
351 with linear models via likelihood ratio tests. Pairwise contrasts were made using 95% confidence  
352 intervals of the pre- and post-typhoon break points for each species and land use data subset.

353

## 354 Results

### 355 *Acoustic index results*

356 We found that NDSI was significantly lower at many sites after the typhoons (Fig. 2a). This  
357 overall pattern seemed not to be driven by an underlying change in the biophony component of NDSI  
358 (Fig. 2b), but rather by an increase in anthropophony following the typhoons (Fig. 2c). There was no  
359 land use or typhoon effect on the temporal stability, resistance, or recovery of NDSI, NDSI<sub>Bio</sub>, or  
360 NDSI<sub>Anthro</sub>. However, in some cases we found differences in acoustic index values following the  
361 typhoons (Table S3).

362

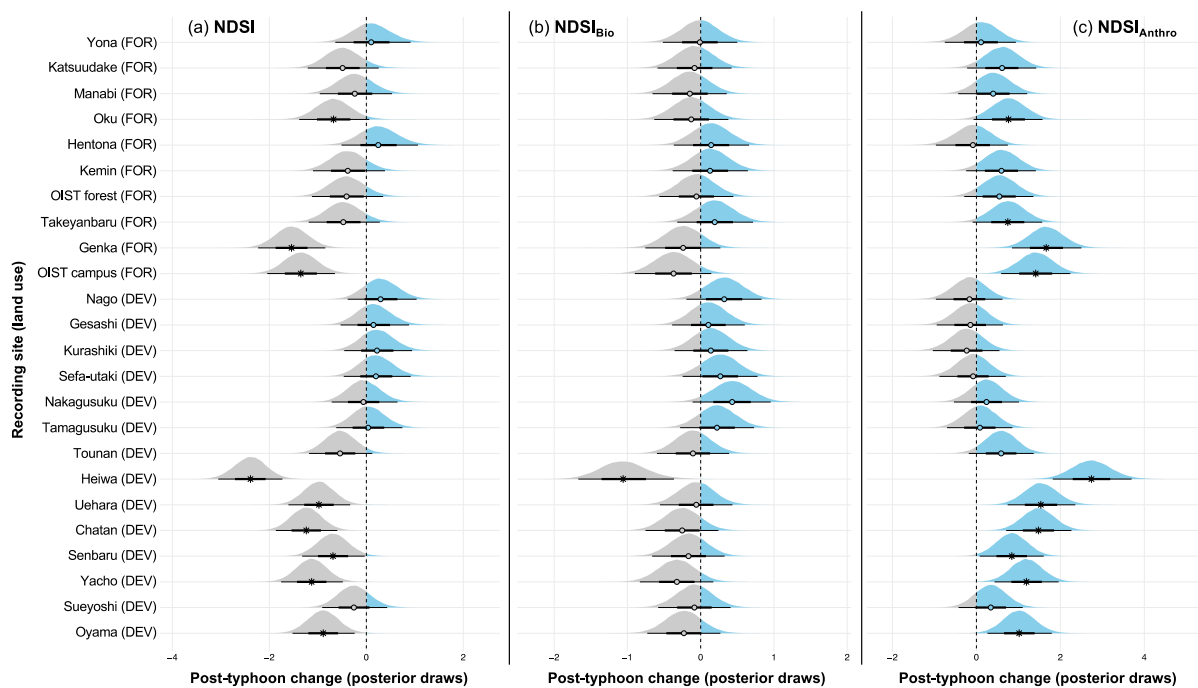

363

364 **Figure 2. Comparison of acoustic index mean state values before and after the typhoons.** Posterior distributions  
365 represent 90,000 post-convergence MCMC draws of the change from pre- to post-typhoon periods, where  
366 values below zero (grey) indicate a post-typhoon decline, and values above zero (blue) a post-typhoon increase  
367 in mean state value. Non-zero-spanning credible intervals are marked with \*, while circles indicate zero-  
368 spanning credible intervals (no change based on the posterior distribution). Draws are shown per site, ordered  
369 from most forested (top) to most developed (bottom) based on principle component axis 1 of the land use  
370 dimensionality reduction (PCA; see Fig. S1). Panels represent changes in mean state values for three acoustic  
371 indices: the normalised difference soundscape index [NDSI] (a), biophony [NDSI<sub>Bio</sub>] (b), and anthropophony  
372 [NDSI<sub>Anthro</sub>] (c).

373

374

375

376

377

378

379

380

381

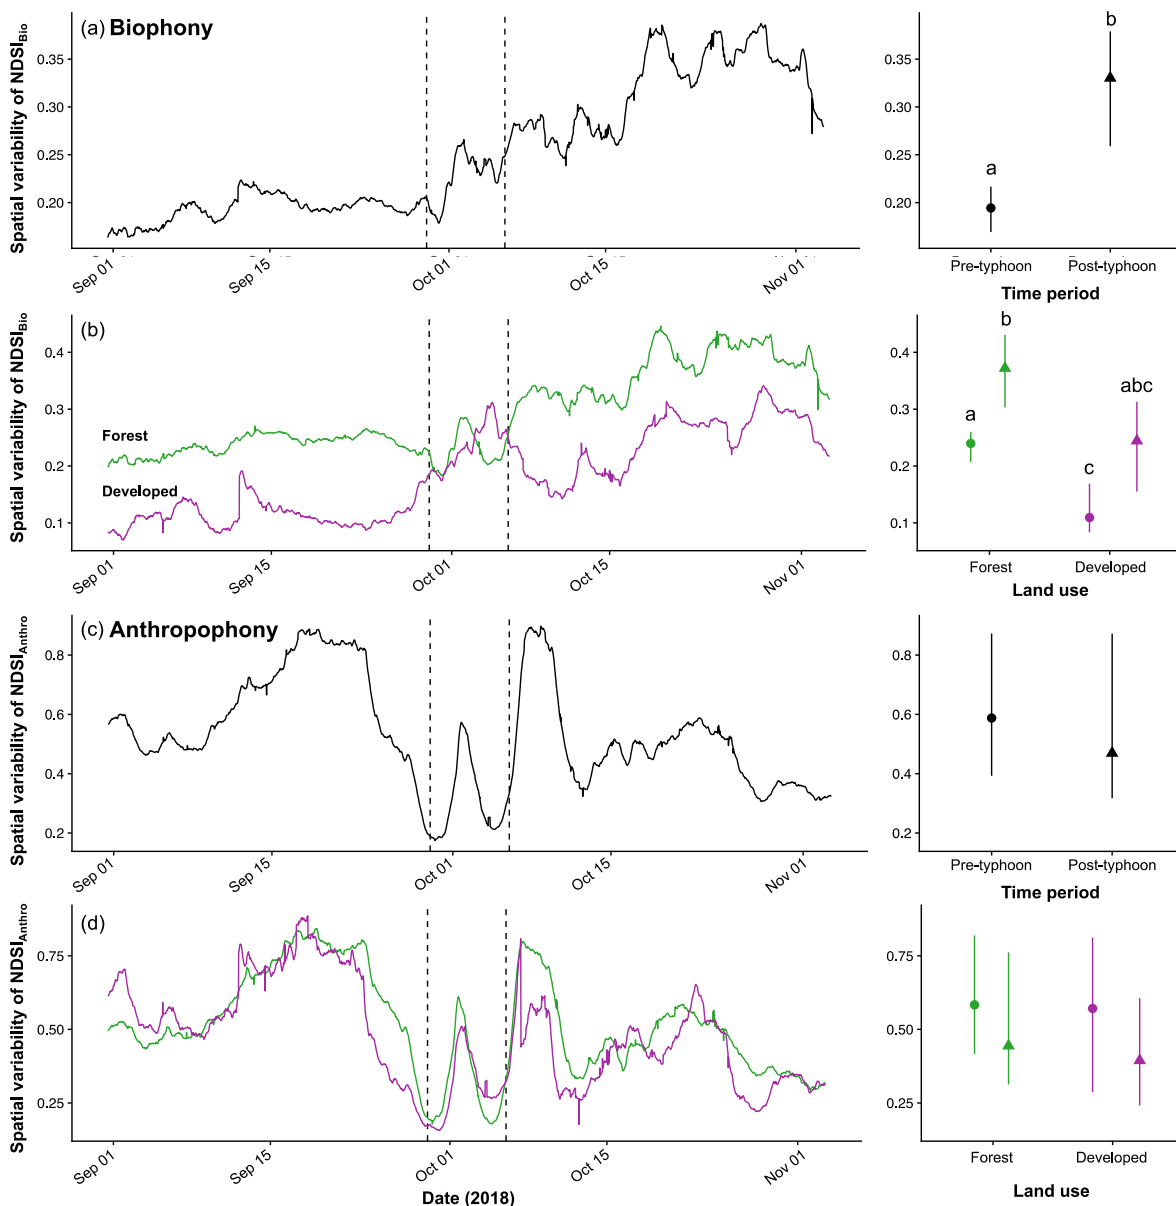

382

383

384

**Figure 3. Spatial variability of biophony [ $NDSI_{Bio}$ ] and Anthropophony [ $NDSI_{Anthro}$ ] through time.** Left panels show time series of  $NDSI_{Bio}$  (a,b) and  $NDSI_{Anthro}$  (c,d) spatial variability across all sites (a,c), and across forest (green)

385 and developed (purple) sites separately (b,d). Dashed lines delineate the pre- and post-typhoon periods. Right  
 386 panels show the 95% confidence intervals of spatial variability across all sites (a,c), and separated by land use  
 387 (b,d), for the pre-typhoon (circles) and post-typhoon (triangles) periods. Significant ( $p < 0.05$ ) pairwise contrasts  
 388 are denoted with different subscript/superscript letters (e.g., “a” differs from “b” but not “ab”).

389

### 390 Automated species detection results

391 Species identity interacted with the typhoons, producing species-specific typhoon responses  
 392 (Table S3). Detections of *C. macrorhynchos* and *O. elegans* were similar preceding and following the  
 393 typhoons (Fig. 4a and 4c), whereas *H. diphone* was detected less often after the typhoons (Fig. 4b).  
 394 We also found that, following the typhoons, species detections were more stable (less variable)  
 395 through time, regardless of the species considered (Fig. 5; Table S3). We found no effect of land use  
 396 on the mean number of daily species detections or the temporal stability of daily detections (Table  
 397 S3).

398

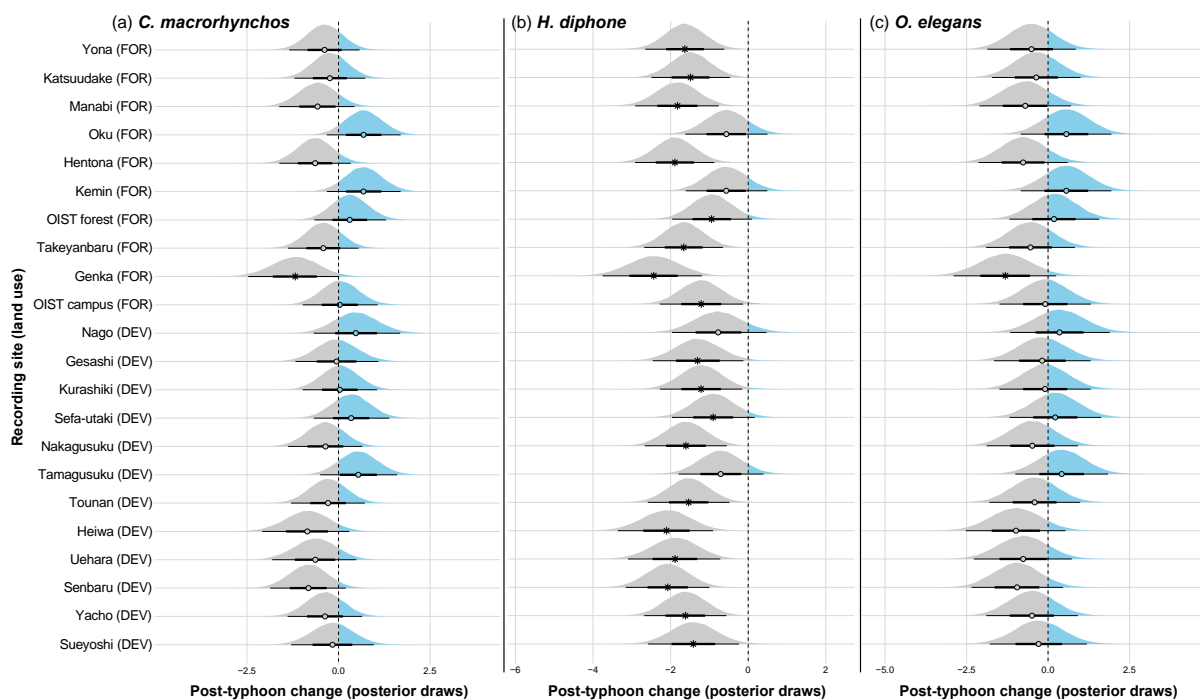

399

400 **Figure 4. Comparison of mean daily species detections before and after the typhoons.** Posterior distributions  
 401 representing 90,000 post-convergence MCMC draws of the change from pre- to post-typhoon periods, where  
 402 values below zero (grey) indicate a post-typhoon decline, and values above zero (blue) a post-typhoon increase  
 403 in mean daily automated species vocalisation detections. Non-zero-spanning credible intervals are marked with  
 404 \*, while circles indicate zero-spanning credible intervals (no change based on the posterior distribution). Draws  
 405 are shown per site, ordered from most forested (top) to most developed (bottom) based on principle  
 406 component axis 1 of the land use dimensionality reduction (PCA; see Fig. S1). Panels represent changes in mean  
 407 daily species detections for our three focal species: *Corvus macrorhynchos* (a), *Horornis diphone* (b), and *Otus*

408 *elegans* (c). Inferred posterior draws (automatically computed through the site random effect term)  
409 extrapolated to field sites where species were not present (Table S1) are shown as faded distributions.  
410

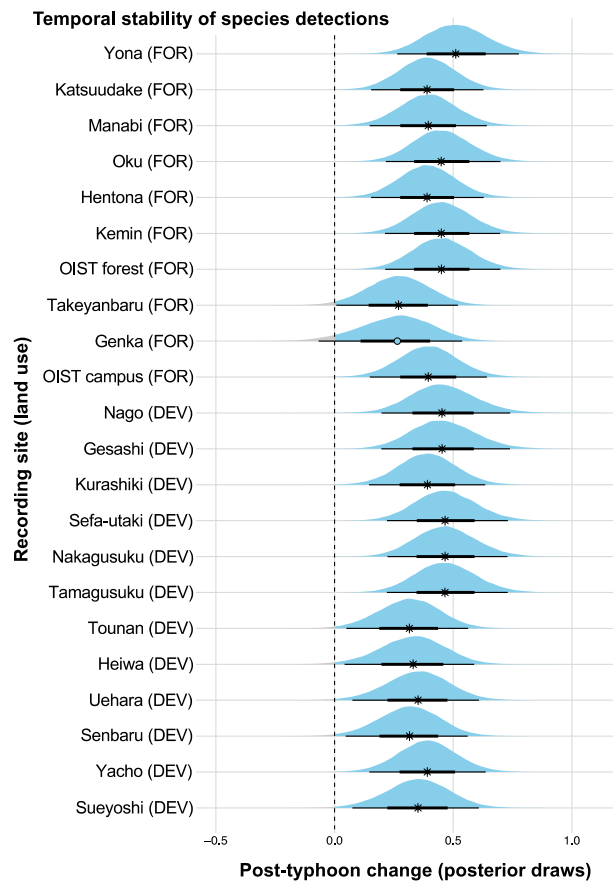

411  
412 **Figure 5. Comparison of temporal stability of species detections before and after the typhoons.** Posterior  
413 distributions represent 90,000 post-convergence MCMC draws of the change from pre- to post-typhoon  
414 periods, where values below zero (grey) indicate a post-typhoon decline, and values above zero (blue) a post-  
415 typhoon increase in the temporal stability of automated species vocalisation detections (all species). Non-zero-  
416 spanning credible intervals are marked with \*, while circles indicate zero-spanning credible intervals (no change  
417 based on the posterior distribution). Draws are shown per site, ordered from most forested (top) to most  
418 developed (bottom) based on principle component axis 1 of the land use dimensionality reduction (Fig. S1). See  
419 Figure S6 for posterior draws of individual species.

420  
421 When modelling the effects of typhoons, land use, and species identity on spatial variability of  
422 bird detections through time, break-point models did not perform significantly better than models  
423 without break point terms based on likelihood ratio tests (Spatial variability across all sites:  $L.Ratio_{13,7}$   
424 = 6.98,  $p = 0.32$ ; within land use categories:  $L.Ratio_{20,10} = 16.2$ ,  $p = 0.093$ ). Accordingly, there was no  
425 significant post-typhoon change in spatial variability of species detections either overall or when  
426 broken down by land use (Fig. 6). Before the typhoons, *Otus elegans* had highest spatial variability in  
427 detections, and after the typhoons its spatial variability remained higher than that of *Corvus*

428 *macrorhynchos*, but not of *Horornis diphone* (Fig. 6a). When further broken down by land use, species  
 429 did not vary in their land use-specific spatial variability before the typhoons. However, after the  
 430 typhoons, *O. elegans* had higher spatial variability in detections among forested sites than did *C.*  
 431 *macrorhynchos* (Fig. 6b).  
 432

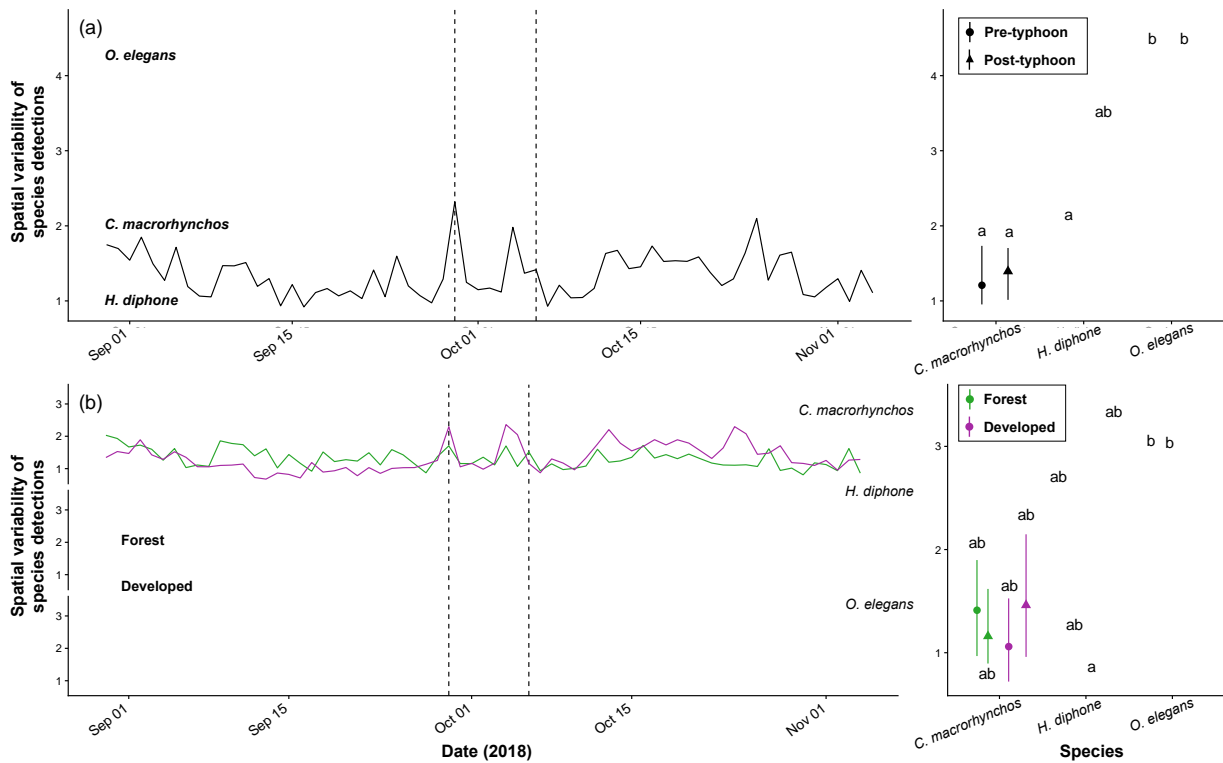

433  
 434 **Figure 6. Spatial variability of automated daily species detections through time.** Left panels show time series of  
 435 spatial variability of daily species detections across all sites (a), and across forest (green) and developed (purple)  
 436 sites separately (b), for each of *Corvus macrorhynchos* (darkest), *Horornis diphone*, and *Otus elegans* (lightest).  
 437 Dashed lines delineate the pre- and post-typhoon periods. Right panels show the 95% confidence intervals of  
 438 spatial variability of daily species detections across all sites (a) or separated by land use (b) for the pre-typhoon  
 439 (circles) and post-typhoon (triangles) periods. Significant ( $p < 0.05$ ) pairwise contrasts are denoted with  
 440 different subscript/superscript letters (e.g., “a” differs from “b” but not “ab”).

441

## 442 Discussion

443 This study leverages high-resolution acoustic monitoring data from an island-wide sensor  
 444 array to record ecological responses to extreme weather events in the form of two large typhoons.  
 445 We found no land use effects on most dimensions of stability measured. However, we found post-  
 446 typhoon increases in the spatial variability of biophony ( $NDSI_{Bio}$ ) and the normalised difference  
 447 soundscape index (NDSI) among forested sites, indicating that the typhoons elicited divergent  
 448 ecological responses among Okinawa’s forests. Moreover, we detected no such change in spatial



449 variability in response to the typhoons among Okinawa's developed urban and agricultural sites. The  
450 observed divergence in biophony responses to typhoons among forest sites, but not developed urban  
451 or agricultural sites, suggests that land use and habitat change can hinder the reactive capacity of  
452 ecological communities and their associated soundscapes. The observed variation in typhoon  
453 responses among forest community soundscapes may indicate a greater variety of pathways through  
454 which biotic communities in forests can respond to disturbance (Vogel et al., 2019). Such *response*  
455 *diversity* is increasingly recognised as a potentially key driver of stability and statistical portfolio  
456 effects, owing to its effects on asynchrony and spatial community dynamics (Mori et al., 2013; Ross et  
457 al., 2022). In contrast, those communities in developed urban or agricultural sites showed more  
458 homogenous responses to the typhoons, perhaps as a direct consequence of land use change *per se*,  
459 or of its effect on local biodiversity. We did not directly measure local biodiversity in this study,  
460 instead estimating the activity of some key focal bird species using automated species detections.  
461 However, previous work in this system provided evidence for a loss of rare and endemic birds under  
462 land use development, producing communities that are a nested subset of forest bird communities in  
463 Okinawa's developed south (Ross et al., 2018). Despite generally aligning well with acoustic index  
464 results for other response measures, the species surveyed here did not exhibit responses that  
465 diverged in space following the typhoons, as might have been expected based on biophony results.  
466 This suggests that the spatial divergence in the biotic component of soundscapes recorded here may  
467 be better explained by other species (of birds or other taxa) not targeted in this study. Future work  
468 expanding on these analyses to provide a more holistic view of the Okinawan biota should therefore  
469 prove fruitful for identifying individual species contributions to typhoon responses. If our biophony  
470 results are indeed a product of biotic responses to typhoons as would be expected from theory  
471 (Kasten et al., 2012), then a post-typhoon increase in spatial variability may reflect changes to species'  
472 patchiness. For example, Willig and Camilo (1991) described an increase in spatial patchiness of the  
473 snail *Caracolus caracol* following Hurricane Hugo in Puerto Rico, caused by a thinning of populations  
474 due to post-hurricane mortality.

475         Soundscape composition after the typhoons saw an increase in anthropophony, but not a  
476 decline in biophony as might be expected were populations impacted negatively by typhoon  
477 disturbance (*e.g.*, Cely, 1991; Pavelka et al., 2007). In contrast, the observed post-typhoon increase in  
478 spatial variability in NDSI was driven by biophony rather than anthropophony. This suggests that, while  
479 biophony may not have been affected substantially by typhoon disturbance at the individual site level,  
480 variation in biotic responses at larger scales across field sites nonetheless manifested as changes in  
481 the spatial variability of biophony after the typhoons. That we did not detect particularly strong site-  
482 level typhoon impacts, but rather saw spatial divergence in ecological responses to typhoons across

483 multiple sites, underscores the necessity of monitoring at scale. Multi-site acoustic sensor arrays such  
484 as ours thus provide opportunity to monitor both local and regional biodiversity change, in turn  
485 providing critical new insight for conservation management (Roe et al., 2021; Sethi et al., 2020a; Van  
486 Parijs et al., 2015). The observed post-typhoon increase in anthropophony on the other hand, likely  
487 reflects a change in sound propagation driven by vegetative structural damage and thinning of  
488 previously dense habitats, as is often documented following large storms (Abbas et al., 2020; Elliott &  
489 Nino, 1960). We did not measure habitat structure directly, and so the causes of increases to  
490 anthropophony following typhoons Trami and Kong-Rey cannot be demonstrated empirically. We did,  
491 however, observe significant damage and alterations to habitat structure of forested field sites (T.  
492 Yoshida & M. Yoshimura, pers. obs.). Automated bird species detections were, conversely, more  
493 stable through time after the typhoons, suggesting disturbance may affect the consistency of species  
494 vocalisations in Okinawa (see also Fraterrigo & Rusak, 2008), or perhaps that typhoon-induced  
495 changes to habitat structure allow vocalisations to travel further without attenuation, and hence be  
496 more reliably detected by our sensors.

497         The focal bird species considered here generally differed in their responses to typhoons.  
498 Automated vocalisation detections of the Japanese bush warbler (*Horornis diphone*) declined after  
499 the typhoons, while those of the large-billed crow (*Corvus macrorhynchos*) and Ryukyu scops owl  
500 (*Otus elegans*) did not. Given that acoustic surveys cannot differentiate between cases where a  
501 species is not producing sound and those where that species is not present (Toth et al., 2022), we  
502 cannot say with certainty that *H. diphone* populations declined following the typhoons. Regardless,  
503 our detected post-typhoon declines in *H. diphone* vocalisations—either through behavioural changes,  
504 distributional shifts, or local mortality—were consistent across >80% of the field sites in which this  
505 species was detected. Habitat specialism may explain the observed species-specific differences in  
506 vocalisation changes following the typhoons; *H. diphone* relies on undergrowth and bushes for  
507 foraging (Haneda & Okabe, 1970) and typhoon disturbance has the potential to alter the structure of  
508 this habitat (Abbas et al., 2020; Elliott & Nino, 1960), in turn affecting the invertebrate communities  
509 on which *H. diphone* feeds (Azuma et al., 1997). In contrast, the forest specialist *O. elegans* was not  
510 detected less frequently after the typhoons, suggesting that its habitat and/or foraging were  
511 unaffected by the typhoons, or perhaps that cavity nesting reduced typhoon impact by reducing  
512 exposure to extreme weather (Inoue et al., 2019). Such species-specific responses to disturbance may  
513 more generally reflect differences in life history and other functional response traits (Suding et al.,  
514 2008), which can be useful predictors of community dynamics, disassembly, and stability in birds (e.g.,  
515 Ausprey et al., 2022; Burivalova et al., 2015; Hordley et al., 2021; Zhang et al., 2016). Similarly,  
516 different vocalisation typhoon responses among field sites may reflect differences in underlying

517 vegetative changes as determined by plant functional response traits. For example, Craven *et al.*  
518 (2016) found that functionally diverse Canadian forests were dominated by trees with response traits  
519 that promoted resilience to recurrent anthropogenic disturbance through rapid regrowth, rather than  
520 resistance to projected climate change through drought or flood tolerance. The response traits of  
521 plants may then, in turn, determine the structural habitat change experienced by birds and other  
522 vocalising animals (*e.g.*, Abbas *et al.*, 2020), as well as directly influencing sound propagation (Morton,  
523 1975).

524         Though we and others have demonstrated the capacity for passive acoustic monitoring  
525 methods to capture unpredictable extreme weather events (Gottesman *et al.*, 2021; Simmons *et al.*,  
526 2021), such methods are often limited in their ability to accurately reflect biodiversity patterns. A  
527 recent meta-analysis reports a generally positive link between acoustic indices and biodiversity  
528 (Alcocer *et al.*, 2022), but one with diminishing effect sizes over time as studies increasingly forego  
529 appropriate validation, and as study designs incorporate yet wider varieties of non-target sounds,  
530 which can hinder the interpretability of those acoustic indices aiming to reflect biodiversity (Ross *et al.*,  
531 2021a). Though our acoustic indices and automated species vocalisation results were not a perfect  
532 match, their joint use provides two separate lines of evidence for typhoon-induced soundscape  
533 change; such species and soundscape methods are still rarely used in combination despite their clear  
534 potential to provide complementary information on ecological dynamics (*e.g.*, Ferreira *et al.*, 2018;  
535 Ross *et al.*, 2018). That said, building reliable vocalisation recognition algorithms remains a challenge,  
536 particularly when aiming for transferability to different habitats or seasons, which provide a range of  
537 non-target sounds beyond those on which algorithms may have been trained. Increasing application  
538 of deep learning to such problems will likely help provide a solution (*e.g.*, Sethi *et al.*, 2020b) as will  
539 continued efforts to build labelled sound libraries from which automated species detection algorithms  
540 can be trained (Deichmann *et al.*, 2018). Moreover, soundscape dynamics are frequently  
541 characterised by strong seasonal cycles (*e.g.*, Vokurková *et al.*, 2018), presenting a challenge when  
542 attempting to disentangle disturbance responses from seasonal soundscape change (Ross *et al.*,  
543 2023). For example, our focal species differ in their seasonality and phenology, meaning that natural  
544 phenological differences may in part be responsible for the differences in species' typhoon responses  
545 we observed here. Our moving average detrend aimed to remove as much seasonal signal as possible,  
546 though longer time series are needed for more sophisticated approaches to deseasonalisation (*e.g.*,  
547 wavelet decomposition) to be effective (Cazelles *et al.*, 2008). Our *k*-means clustering approach to  
548 distinguish field sites by their dominant land use identified an optimal split of two clusters, separating  
549 primarily forested sites from those dominated by developed urban or agricultural land use. However,  
550 these developed land uses can act on ecological dynamics and stability in different ways. For example,

551 Olivier *et al.* (2020) used citizen science data from across France to show that agricultural  
552 intensification directly affected population, and, in turn, community stability of birds, while  
553 urbanisation acted only indirectly on community stability through changes to diversity and population  
554 asynchrony. Our study design, which was based on unsupervised (*k*-means) site clustering by  
555 dominant land use consequently did not allow us to directly compare urban and agricultural field  
556 sites, despite their potential for contrasting effects on ecological stability.

557 Our study tested the capacity for land use and climate change in the form of extreme  
558 weather events to jointly shape ecological stability. Using passive acoustic monitoring data from a  
559 landscape-scale sensor network across Okinawa Island, we found that land use rarely modified  
560 ecological responses to typhoons. However, soundscapes diverged across the landscape following the  
561 typhoons, contrary to the expected typhoon-induced soundscape homogenisation. This post-typhoon  
562 spatial divergence occurred among forested but not developed urban and agricultural field sites,  
563 suggesting that forest sites exhibited a wider variety of pathways through which soundscapes could  
564 respond to typhoon disturbance. That is, land use intensification may produce ecological communities  
565 that are more homogeneous in how they respond to disturbance (Vogel *et al.*, 2019), while forest  
566 sites harbour communities with greater potential for collective resilience to future disturbance  
567 through patch dynamics and rescue effects among different local forest communities (Leibold *et al.*,  
568 2004). Such spatial insurance effects have the potential to contribute to landscape-scale stability and  
569 spatial portfolio effects by affecting population and community asynchrony (Loreau *et al.*, 2003; Wang  
570 *et al.*, 2021), and our results suggest that land use development can degrade the natural insurance  
571 capacity of Okinawa's forests. This study draws on prior knowledge of Okinawan biodiversity (Inoue *et al.*,  
572 2019; Itô *et al.*, 2000; McWhirter *et al.*, 1996), the performance of passive acoustic methods in  
573 this system (Ross *et al.*, 2018, 2021a), and the characteristics of typhoons and land use intensification  
574 across Okinawa Island (Elliott & Nino, 1960; Takeuchi *et al.*, 1981). Such baseline data provides a  
575 critical backdrop against which our results stand, allowing us to infer species and soundscape  
576 responses to the joint threats of climate change and land use intensification from acoustic recordings  
577 of typhoons (Altwegg *et al.*, 2017). As longer and higher-resolution acoustic data is amassed through  
578 multi-site acoustic sensor arrays (*e.g.*, Roe *et al.*, 2021; Sethi *et al.*, 2020a; Van Parijs *et al.*, 2015), the  
579 utility of passive acoustic monitoring to document ecological responses to extreme weather events  
580 across the globe will become ever clearer, particularly in light of the increasing frequency and  
581 destructive potential of extreme events in the Anthropocene.

## 582 583 **Acknowledgements**

584 Many individuals in the OKEON Churamori Project contributed to data collection, site maintenance, and  
585 community outreach; we especially thank Masako Ogasawara, Mayuko Suwabe, Shinji Iriyama, Toshihiro

586 Kinjo, Izumi Maehira, Yuko Matsudo, Seiichiro Nakagawa, Shoko Suzuki, Takumi Uchima, Madoka Oguro,  
587 and Chisa Oshiro. We are grateful for the help and support provided by the Scientific Computing and Data  
588 Analysis section of the Research Support Division at OIST. Our sincere thanks go to the landowners,  
589 museums, local governments, and schools that host the OKEON Churamori Project field sampling sites, and  
590 to the people of Okinawa. We also thank Marina Lašić and Rob McHenry for their contributions to building  
591 automated species recognisers, Yvonne Buckley and Anne Magurran for helpful discussion, and Vito  
592 Muggeo for advice on break-point modelling in R. This work was supported by subsidy funding to OIST, and  
593 an Irish Research Council Postgraduate Scholarship [GOIPG/2018/3023] and Canon Foundation in Europe  
594 2021 Research Fellowship awarded to S.R.P.-J.R.

595

### 596 **Conflict of Interest**

597 The authors declare no conflict of interest.

598

### 599 **Data availability statement**

600 The data supporting the findings of this study and all R code are available via the Zenodo digital repository  
601 as Ross, S. R. P.-J., Friedman, N. R., Armitage, D. W., Dudley, K. L., Yoshimura, M., Yoshida, T., Economo, E.  
602 P., & Donohue, I. (2023). Habitat degradation homogenizes ecological responses to typhoons across a  
603 subtropical island (v0.2-review) [Data set]. Zenodo. <https://doi.org/10.5281/zenodo.7520062>

604

### 605 **ORCID**

606 *Samuel R.P.-J. Ross*: <https://orcid.org/0000-0001-9402-9119>

607 *Nicholas R. Friedman*: <https://orcid.org/0000-0002-0533-6801>

608 *David W. Armitage*: <https://orcid.org/0000-0002-5677-0501>

609 *Kenneth L. Dudley*: <https://orcid.org/0000-0003-3594-0724>

610 *Takuma Yoshida*: <https://orcid.org/0000-0002-2172-9488>

611 *Masashi Yoshimura*: <https://orcid.org/0000-0003-1468-5541>

612 *Evan P. Economo*: <https://orcid.org/0000-0001-7402-0432>

613 *Ian Donohue*: <https://orcid.org/0000-0002-4698-6448>

614

### 615 **References**

616 Abbas, S., Nichol, J. E., Fischer, G. A., Wong, M. S., & Irteza, S. M. (2020). Impact assessment of a super-typhoon  
617 on Hong Kong's secondary vegetation and recommendations for restoration of resilience in the forest  
618 succession. *Agricultural and Forest Meteorology*, 280, 107784.  
619 <https://doi.org/10.1016/j.agrformet.2019.107784>

- 620 Alcocer, I., Lima, H., Sugai, L. S. M., & Llusia, D. (2022). Acoustic indices as proxies for biodiversity: A meta-  
621 analysis. *Biological Reviews*. <https://doi.org/10.1111/brv.12890>
- 622 Altwegg, R., Visser, V., Bailey, L. D., & Erni, B. (2017). Learning from single extreme events. *Philosophical*  
623 *Transactions of the Royal Society B: Biological Sciences*, 372(1723), 20160141.  
624 <https://doi.org/10.1098/rstb.2016.0141>
- 625 Ares, Á., Brisbin, M. M., Sato, K. N., Martín, J. P., Iinuma, Y., & Mitarai, S. (2020). Extreme storms cause rapid but  
626 short-lived shifts in nearshore subtropical bacterial communities. *Environmental Microbiology*, 22(11),  
627 4571–4588. <https://doi.org/10.1111/1462-2920.15178>
- 628 Ausprey, I. J., Newell, F. L., & Robinson, S. K. (2022). Functional response traits and altered ecological niches  
629 drive the disassembly of cloud forest bird communities in tropical montane countrysides. *Journal of*  
630 *Animal Ecology*, 91(11), 2314–2328. <https://doi.org/10.1111/1365-2656.13816>
- 631 Azuma, S., Sasaki, K., & Itô, Y. (1997). Effects of undergrowth removal on the species diversity of insects in  
632 natural forests of Okinawa Hontô. *Pacific Conservation Biology*, 3(2), 156–160.  
633 <https://doi.org/10.1071/pc970156>
- 634 Baert, J. M., De Laender, F., Sabbe, K., & Janssen, C. R. (2016). Biodiversity increases functional and  
635 compositional resistance, but decreases resilience in phytoplankton communities. *Ecology*, 97(12),  
636 3433–3440. <https://doi.org/10.1002/ecy.1601>
- 637 Bhatia, K. T., Vecchi, G. A., Knutson, T. R., Murakami, H., Kossin, J., Dixon, K. W., & Whitlock, C. E. (2019). Recent  
638 increases in tropical cyclone intensification rates. *Nature Communications*, 10(1), Article 1.  
639 <https://doi.org/10.1038/s41467-019-08471-z>
- 640 Boyd, A. D., Gowans, S., Mann, D. A., & Simard, P. (2021). Tropical Storm Debby: Soundscape and fish sound  
641 production in Tampa Bay and the Gulf of Mexico. *PLOS ONE*, 16(7), e0254614–e0254614.  
642 <https://doi.org/10.1371/JOURNAL.PONE.0254614>
- 643 Bradfer-Lawrence, T., Bunnefeld, N., Gardner, N., Willis, S. G., & Dent, D. H. (2020). Rapid assessment of avian  
644 species richness and abundance using acoustic indices. *Ecological Indicators*, 115(April), 106400–  
645 106400. <https://doi.org/10.1016/j.ecolind.2020.106400>
- 646 Burivalova, Z., Game, E. T., & Butler, R. A. (2019). The sound of a tropical forest. *Science*, 363(6422), 28–29.  
647 <https://doi.org/10.1126/science.aav1902>

- 648 Burivalova, Z., Lee, T. M., Giam, X., Sekercioglu, Ç. H., Wilcove, D. S., & Koh, L. P. (2015). Avian responses to  
649 selective logging shaped by species traits and logging practices. *Proceedings of the Royal Society B:  
650 Biological Sciences*, 282(1808). <https://doi.org/10.1098/rspb.2015.0164>
- 651 Burivalova, Z., Şekercioğlu, Ç. H., & Koh, L. P. (2014). Thresholds of logging intensity to maintain tropical forest  
652 biodiversity. *Current Biology*, 24(16), 1893–1898. <https://doi.org/10.1016/j.cub.2014.06.065>
- 653 Bürkner, P.-C. (2017). brms: An R package for Bayesian multilevel models using Stan. *Journal of Statistical  
654 Software*, 80, 1–28.
- 655 Butsic, V., Lewis, D. J., Radeloff, V. C., Baumann, M., & Kuemmerle, T. (2017). Quasi-experimental methods  
656 enable stronger inferences from observational data in ecology. *Basic and Applied Ecology*, 19, 1–10.  
657 <https://doi.org/10.1016/j.baae.2017.01.005>
- 658 Cazelles, B., Chavez, M., Berteaux, D., Ménard, F., Vik, J. O., Jenouvrier, S., & Stenseth, N. C. (2008). Wavelet  
659 analysis of ecological time series. *Oecologia*, 156(2), 287–304. [https://doi.org/10.1007/s00442-008-](https://doi.org/10.1007/s00442-008-0993-2)  
660 0993-2
- 661 Cely, J. E. (1991). Wildlife Effects of Hurricane Hugo. *Journal of Coastal Research*, 319–326.
- 662 Chevalier, M., Lindström, Å., Pärt, T., & Knape, J. (2019). Changes in forest bird abundance, community structure  
663 and composition following a hurricane in Sweden. *Ecography*, 42(11), 1862–1873.  
664 <https://doi.org/10.1111/ecog.04578>
- 665 Clark, A. T., Arnoldi, J.-F., Zelnik, Y. R., Barabas, G., Hodapp, D., Karakoç, C., ... Harpole, S. (2021). General  
666 statistical scaling laws for stability in ecological systems. *Ecology Letters* 24(7), 1474–1486.  
667 <https://doi.org/10.1111/ele.13760>
- 668 Cohen, J. M., Fink, D., & Zuckerberg, B. (2021). Extreme winter weather disrupts bird occurrence and abundance  
669 patterns at geographic scales. *Ecography*, 1–13. <https://doi.org/10.1111/ecog.05495>
- 670 Craven, D., Filotas, E., Angers, V. A., & Messier, C. (2016). Evaluating resilience of tree communities in  
671 fragmented landscapes: Linking functional response diversity with landscape connectivity. *Diversity and  
672 Distributions*, 22(5), 505–518. <https://doi.org/10.1111/ddi.12423>
- 673 Daskalova, G. N., Myers-Smith, I. H., Bjorkman, A. D., Blowes, S. A., Supp, S. R., Magurran, A. E., & Dornelas, M.  
674 (2020). Landscape-scale forest loss as a catalyst of population and biodiversity change Downloaded  
675 from. *Science*, 368(June), 1341–1347.

- 676 Deichmann, J. L., Acevedo-Charry, O., Barclay, L., Burivalova, Z., Campos-Cerqueira, M., D’Horta, F., ... Aide, T. M.  
677 (2018). It’s time to listen: There is much to be learned from the sounds of tropical ecosystems.  
678 *Biotropica*, 50(5), 713–718. <https://doi.org/10.1111/btp.12593>
- 679 Deichmann, J. L., Hernández-Serna, A., Delgado C., J. A., Campos-Cerqueira, M., & Aide, T. M. (2017).  
680 Soundscape analysis and acoustic monitoring document impacts of natural gas exploration on  
681 biodiversity in a tropical forest. *Ecological Indicators*, 74, 39–48.  
682 <https://doi.org/10.1016/j.ecolind.2016.11.002>
- 683 Depraetere, M., Pavoine, S., Jiguet, F., Gasc, A., Duvail, S., & Sueur, J. (2012). Monitoring animal diversity using  
684 acoustic indices: Implementation in a temperate woodland. *Ecological Indicators*, 13(1), 46–54.  
685 <https://doi.org/10.1016/j.ecolind.2011.05.006>
- 686 Donihue, C. M., Herrel, A., Fabre, A. C., Kamath, A., Geneva, A. J., Schoener, T. W., Kolbe, J. J., & Losos, J. B.  
687 (2018). Hurricane-induced selection on the morphology of an island lizard. *Nature*, 560(7716), 88–91.  
688 <https://doi.org/10.1038/s41586-018-0352-3>
- 689 Donohue, I., Petchey, O. L., Montoya, J. M., Jackson, A. L., McNally, L., Viana, M., ... Emmerson, M. C. (2013). On  
690 the dimensionality of ecological stability. *Ecology Letters*, 16(4), 421–429.  
691 <https://doi.org/10.1111/ele.12086>
- 692 Elliott, J. C., & Nino, Y. (1960). Okinawa’s Dry Typhoons. *American Midland Naturalist*, 63(1), 211–211.  
693 <https://doi.org/10.2307/2422941>
- 694 Emanuel, K. (2005). Increasing destructiveness of tropical cyclones over the past 30 years. *Nature*, 436(7051),  
695 Article 7051. <https://doi.org/10.1038/nature03906>
- 696 Everham, E. M., & Brokaw, N. V. L. (1996). Forest damage and recovery from catastrophic wind. *The Botanical*  
697 *Review* 1996 62:2, 62(2), 113–185. <https://doi.org/10.1007/BF02857920>
- 698 Fairbrass, A. J., Rennett, P., Williams, C., Titheridge, H., & Jones, K. E. (2017). Biases of acoustic indices  
699 measuring biodiversity in urban areas. *Ecological Indicators*, 83(February), 169–177.  
700 <https://doi.org/10.1016/j.ecolind.2017.07.064>
- 701 Ferreira, L. M., Oliveira, E. G., Lopes, L. C., Brito, M. R., Baumgarten, J., Rodrigues, F. H., & Sousa-Lima, R. S.  
702 (2018). What do insects, anurans, birds, and mammals have to say about soundscape indices in a  
703 tropical savanna. *Journal of Ecoacoustics*, 2, PVH6YZ-PVH6YZ. <https://doi.org/10.22261/JEA.PVH6YZ>



- 704 Fraterrigo, J. M., & Rusak, J. A. (2008). Disturbance-driven changes in the variability of ecological patterns and  
705 processes. *Ecology Letters*, 11(7), 756–770. <https://doi.org/10.1111/j.1461-0248.2008.01191.x>
- 706 Gardner, L. R., Michener, W. K., Blood, E. R., Williams, T. M., Lipscomb, D. J., & Jefferson, W. H. (1991).  
707 Ecological Impact of Hurricane Hugo—Salinization of a Coastal Forest on JSTOR. *Journal of Coastal*  
708 *Research*, 8, 301–317.
- 709 Gasc, A., Francomano, D., Dunning, J. B., & Pijanowski, B. C. (2017). Future directions for soundscape ecology:  
710 The importance of ornithological contributions. *The Auk*, 134(1), 215–228.  
711 <https://doi.org/10.1642/AUK-16-124.1>
- 712 Gasc, A., Gottesman, B. L., Francomano, D., Jung, J., Durham, M., Mateljak, J., & Pijanowski, B. C. (2018).  
713 Soundscapes reveal disturbance impacts: Biophonic response to wildfire in the Sonoran Desert Sky  
714 Islands. *Landscape Ecology*, 33, 1399–1415. <https://doi.org/10.1007/s10980-018-0675-3>
- 715 Gelman, A., & Hill, J. (2006). *Data analysis using regression and multilevel/hierarchical models*. Cambridge  
716 university press.
- 717 Gibb, R., Browning, E., Glover-Kapfer, P., & Jones, K. E. (2019). Emerging opportunities and challenges for  
718 passive acoustics in ecological assessment and monitoring. *Methods in Ecology and Evolution*.  
719 <https://doi.org/10.1111/2041-210X.13101>
- 720 Gibson, L., Lee, T. M., Koh, L. P., Brook, B. W., Gardner, T. a., Barlow, J., ... Sodhi, N. S. (2011). Primary forests are  
721 irreplaceable for sustaining tropical biodiversity. *Nature*, 478(7369), 378–381.  
722 <https://doi.org/10.1038/nature10425>
- 723 Gittleman, J. L., & Kot, M. (1990). Adaptation: Statistics and a null model for estimating phylogenetic effects.  
724 *Systematic Zoology*, 39(3), 227–241.
- 725 Gottesman, B. L., Olson, J. C., Yang, S., Acevedo-Charry, O., Francomano, D., Martinez, F. A., ... Pijanowski, B. C.  
726 (2021). What does resilience sound like? Coral reef and dry forest acoustic communities respond  
727 differently to Hurricane Maria. *Ecological Indicators*, 126, 107635.  
728 <https://doi.org/10.1016/j.ecolind.2021.107635>
- 729 Hamao, S. (2013). Acoustic structure of songs in island populations of the Japanese bush warbler, *Cettia*  
730 *diphone*, in relation to sexual selection. *Journal of Ethology*, 31(1), 9–15.  
731 <https://doi.org/10.1007/s10164-012-0341-1>

- 732 Haneda, K., & Okabe, T. (1970). The life history of *Cettia diphone* 1. Breeding ecology. *Journal of the Yamashina*  
733 *Institute for Ornithology*, 6(1–2), 131–140.
- 734 Harris, S. A., Shears, N. T., & Radford, C. A. (2016). Ecoacoustic indices as proxies for biodiversity on temperate  
735 reefs. *Methods in Ecology and Evolution*, 7(6), 713–724. <https://doi.org/10.1111/2041-210X.12527>
- 736 Hillebrand, H., Langenheder, S., Lebret, K., Lindström, E., Östman, Ö., & Striebel, M. (2018). Decomposing  
737 multiple dimensions of stability in global change experiments. *Ecology Letters*, 21(1), 21–30.  
738 <https://doi.org/10.1111/ele.12867>
- 739 Hordley, L. A., Gillings, S., Petchey, O. L., Tobias, J. A., & Oliver, T. H. (2021). Diversity of response and effect  
740 traits provides complementary information about avian community dynamics linked to ecological  
741 function. *Functional Ecology*, 35(9), 1938–1950. <https://doi.org/10.1111/1365-2435.13865>
- 742 Hyndman, R. J., & Khandakar, Y. (2008). Automatic Time Series Forecasting: The forecast Package for R. *Journal*  
743 *of Statistical Software*, 27(1), 1–22. <https://doi.org/10.18637/JSS.V027.I03>
- 744 Inoue, T., Matsumoto, M., Yoshida, T., & Washitani, I. (2019). Spatial patterns of the Ryukyu Scops Owl's *Otus*  
745 *elegans* breeding success and forest landscape factors on Amami-Ōshima island. *Japanese Journal of*  
746 *Ornithology*, 68(1), 19–28. <https://doi.org/10.3838/JJO.68.19>
- 747 Itô, Y., Miyagi, K., & Ota, H. (2000). Imminent extinction crisis among the endemic species of the forests of  
748 Yanbaru, Okinawa, Japan. *Oryx*, 34(4), 305–316. <https://doi.org/10.1046/J.1365-3008.2000.00136.X>
- 749 Japan Meteorological Agency (2018). *RSMC Tokyo-Typhoon Center*. International Number ID 1824 (Typhoon  
750 Trami) and 1825 (Typhoon Kong-Rey). [https://www.jma.go.jp/jma/jma-eng/jma-center/rsmc-hp-pub-](https://www.jma.go.jp/jma/jma-eng/jma-center/rsmc-hp-pub-eg/bstve_2018_m.html)  
751 [eg/bstve\\_2018\\_m.html](https://www.jma.go.jp/jma/jma-eng/jma-center/rsmc-hp-pub-eg/bstve_2018_m.html) [Accessed: 27 July 2020].
- 752 Kasten, E. P., Gage, S. H., Fox, J., & Joo, W. (2012). The remote environmental assessment laboratory's acoustic  
753 library: An archive for studying soundscape ecology. *Ecological Informatics*, 12, 50–67.  
754 <https://doi.org/10.1016/j.ecoinf.2012.08.001>
- 755 Kéfi, S., Domínguez-García, V., Donohue, I., Fontaine, C., Thébault, E., & Dakos, V. (2019). Advancing our  
756 understanding of ecological stability. *Ecology Letters*, ele.13340-ele.13340.  
757 <https://doi.org/10.1111/ele.13340>
- 758 Keitt, T. H., & Abelson, E. S. (2021). Ecology in the Age of Automation. *Science*, 373(6557), 858–859.

- 759 Kerr, A. M. (2000). Defoliation of an island (Guam, Mariana Archipelago, Western Pacific Ocean) following a  
760 saltspray-laden “dry” typhoon. *Journal of Tropical Ecology*, 16(6), 895–901.  
761 <https://doi.org/10.1017/S0266467400001796>
- 762 Kossin, J. P., Knapp, K. R., Olander, T. L., & Velden, C. S. (2020). Global increase in major tropical cyclone  
763 exceedance probability over the past 40 years. *Proceedings of the National Academy of Sciences, In*  
764 *review*. <https://doi.org/10.1073/pnas.1920849117>
- 765 Laurance, W. F. (1998). A crisis in the making: Responses of Amazonian forests to land use and climate change.  
766 *Trends in Ecology & Evolution*, 13(10), 411–415. [https://doi.org/10.1016/S0169-5347\(98\)01433-5](https://doi.org/10.1016/S0169-5347(98)01433-5)
- 767 Leibold, M. A., Holyoak, M., Mouquet, N., Amarasekare, P., Chase, J. M., Hoopes, M. F., ... Gonzalez, A. (2004).  
768 The metacommunity concept: A framework for multi-scale community ecology. *Ecology Letters*, 7(7),  
769 601–613. <https://doi.org/10.1111/j.1461-0248.2004.00608.x>
- 770 Li, L., & Chakraborty, P. (2020). Slower decay of landfalling hurricanes in a warming world. *Nature*, 587(7833),  
771 230–234. <https://doi.org/10.1038/s41586-020-2867-7>
- 772 Lin, T. C., Hogan, J. A., & Chang, C. T. (2020). Tropical Cyclone Ecology: A Scale-Link Perspective. *Trends in*  
773 *Ecology and Evolution*, xx(xx), 0–10. <https://doi.org/10.1016/j.tree.2020.02.012>
- 774 Locascio, J. V., & Mann, D. A. (2005). Effects of Hurricane Charley on fish chorusing. *Biology Letters*, 1(3), 362–  
775 365. <https://doi.org/10.1098/rsbl.2005.0309>
- 776 Lomolino, M. V., Pijanowski, B. C., & Gasc, A. (2015). The silence of biogeography. *Journal of Biogeography*,  
777 42(7), 1187–1196. <https://doi.org/10.1111/jbi.12525>
- 778 Loreau, M., Mouquet, N., Gonzalez, A., & Mooney, H. A. (2003). *Biodiversity as spatial insurance in*  
779 *heterogeneous landscapes*. [www.pnas.org/cgi/doi/10.1073/pnas.2235465100](http://www.pnas.org/cgi/doi/10.1073/pnas.2235465100)
- 780 McWhirter, D. W., Ikenaga, H., Iozawa, H., Shoyama, M., & Takehara, K. (1996). A check-list of the birds of  
781 Okinawa Prefecture with notes on recent status including hypothetical records. *Bulletin of Okinawa*  
782 *Prefectural Museum*, 22, 33–152.
- 783 Mori, A. S., Furukawa, T., & Sasaki, T. (2013). Response diversity determines the resilience of ecosystems to  
784 environmental change. *Biological reviews*, 88, 349–364.
- 785 Morimoto, J., Aiba, M., Furukawa, F., Mishima, Y., Yoshimura, N., Nayak, S., ... Nakamura, F. (2021). Risk  
786 assessment of forest disturbance by typhoons with heavy precipitation in northern Japan. *Forest*  
787 *Ecology and Management*, 479, 118521. <https://doi.org/10.1016/j.foreco.2020.118521>

- 788 Morton, E. S. (1975). Ecological Sources of Selection on Avian Sounds. *The American Naturalist*, 109(965), 17–  
789 34. <https://doi.org/10.1086/282971>
- 790 Muggeo, V. M. R. (2008). *segmented: An R Package to Fit Regression Models with Broken-Line Relationships*. 8,  
791 7.
- 792 Nimmo, D. G., Haslem, A., Radford, J. Q., Hall, M., & Bennett, A. F. (2016). Riparian tree cover enhances the  
793 resistance and stability of woodland bird communities during an extreme climatic event. *Journal of*  
794 *Applied Ecology*, 53(2), 449–458. <https://doi.org/10.1111/1365-2664.12535>
- 795 Olivier, T., Thébault, E., Elias, M., Fontaine, B., & Fontaine, C. (2020). Urbanization and agricultural  
796 intensification destabilize animal communities differently than diversity loss. *Nature Communications*,  
797 2020, 1–9. <https://doi.org/10.1038/s41467-020-16240-6>
- 798 Pavelka, M. S. M., McGoogan, K. C., & Steffens, T. S. (2007). Population Size and Characteristics of *Alouatta pigra*  
799 Before and After a Major Hurricane. *International Journal of Primatology*, 28(4), 919–929.  
800 <https://doi.org/10.1007/s10764-007-9136-6>
- 801 Pijanowski, B. C., Farina, A., Gage, S. H., Dumyahn, S. L., & Krause, B. L. (2011a). What is soundscape ecology? An  
802 introduction and overview of an emerging new science. *Landscape Ecology*, 26(9), 1213–1232.  
803 <https://doi.org/10.1007/s10980-011-9600-8>
- 804 Pijanowski, B. C., Villanueva-Rivera, L. J., Dumyahn, S. L., Farina, A., Krause, B. L., Napoletano, B. M., Gage, S. H.,  
805 & Pieretti, N. (2011b). Soundscape Ecology: The Science of Sound in the Landscape. *BioScience*, 61(3),  
806 203–216. <https://doi.org/10.1525/bio.2011.61.3.6>
- 807 Pimm, S. L. (1984). The complexity and stability of ecosystems. *Nature*, 307(5949), 321–326.  
808 <https://doi.org/10.1038/307321a0>
- 809 R Core Team (2021). R: A language and environment for statistical computing. R Foundation for Statistical  
810 Computing, Vienna, Austria. URL
- 811 Rajan, S. C., Dominic, L., M., V., K, A., NP, S., & R, J. (2022). Surrogacy of post natural disaster acoustic indices for  
812 biodiversity assessment. *Environmental Challenges*, 6, 100420.  
813 <https://doi.org/10.1016/j.envc.2021.100420>
- 814 Raymond, C., Horton, R. M., Zscheischler, J., Martius, O., AghaKouchak, A., Balch, J., Bowen, S. G., Camargo, S. J.,  
815 Hess, J., Kornhuber, K., Oppenheimer, M., Ruane, A. C., Wahl, T., & White, K. (2020). Understanding

- 816 and managing connected extreme events. *Nature Climate Change*, 10(7), 611–621.
- 817 <https://doi.org/10.1038/s41558-020-0790-4>
- 818 Roe, P., Eichinski, P., Fuller, R. A., McDonald, P. G., Schwarzkopf, L., Towsey, M., ... Watson, D. M. (2021). The  
819 Australian acoustic observatory. *Methods in Ecology and Evolution*, 12, 1802–1808.
- 820 Ross, S. R. P.-J., Friedman, N. R., Dudley, K. L., Yoshimura, M., Yoshida, T., & Economo, E. P. (2018). Listening to  
821 ecosystems: Data-rich acoustic monitoring through landscape-scale sensor networks. *Ecological*  
822 *Research*, 33(1), 135–147. <https://doi.org/10.1007/s11284-017-1509-5>
- 823 Ross, S. R. P.-J., Friedman, N. R., Janicki, J., & Economo, E. P. (2019). A test of trophic and functional island  
824 biogeography theory with the avifauna of a continental archipelago. *Journal of Animal Ecology*, 88(9),  
825 1392–1405. <https://doi.org/10.1111/1365-2656.13029>
- 826 Ross, S. R. P.-J., Friedman, N. R., Yoshimura, M., Yoshida, T., Donohue, I., & Economo, E. P. (2021a). Utility of  
827 acoustic indices for ecological monitoring in complex sonic environments. *Ecological Indicators*,  
828 121(November 2020), 107114–107114. <https://doi.org/10.1016/j.ecolind.2020.107114>
- 829 Ross, S. R. P.-J., O'Connell, D. P., Deichmann, J. L., Desjonquères, C., Gasc, A., Phillips, J. N., ... Burivalova, Z.  
830 (2023). Passive Acoustic Monitoring provides a fresh perspective on fundamental ecological questions.  
831 *Functional Ecology*. (Article in press).
- 832 Ross, S. R. P.-J., Petchey, O. L., Sasaki, T., Armitage, D. W. (2022). How to measure response diversity. bioRxiv.  
833 <https://doi.org/10.1101/2022.04.26.489626>
- 834 Ross, S. R. P.-J., Suzuki, Y., Kondoh, M., Suzuki, K., Villa Martín, P., & Dornelas, M. (2021b). Illuminating the  
835 intrinsic and extrinsic drivers of ecological stability across scales. *Ecological Research*, 36(3), 364–378.  
836 <https://doi.org/10.1111/1440-1703.12214>
- 837 Rossi, T., Connell, S. D., & Nagelkerken, I. (2017). The sounds of silence: Regime shifts impoverish marine  
838 soundscapes. *Landscape Ecology*, 32, 239–248. <https://doi.org/10.1007/s10980-016-0439-x>
- 839 Seki, S.-I. (2005). The effects of a typhoon (9918 Bart, 1999) on the bird community in a warm temperate forest,  
840 Southern Japan. *Ornithological Science*, 4(2), 117–128. <https://doi.org/10.2326/osj.4.117>
- 841 Senzaki, M., Barber, J. R., Phillips, J. N., Carter, N. H., Cooper, C. B., Ditmer, M. A., ... Mennitt, D. J. (2020).  
842 Sensory pollutants alter bird phenology and fitness across a continent. *Nature*, 587, 605–609.  
843 <https://doi.org/10.1038/s41586-020-2903-7>

- 844 Sethi, S. S., Ewers, R. M., Jones, N. S., Signorelli, A., Picinali, L., & Orme, C. D. L. (2020a). SAFE Acoustics: An  
845 open-source, real-time eco-acoustic monitoring network in the tropical rainforests of Borneo. *Methods*  
846 *in Ecology and Evolution*, *11*, 1182–1185. <https://doi.org/10.1111/2041-210X.13438>
- 847 Sethi, S. S., Jones, N. S., Fulcher, B. D., Picinali, L., Clink, D. J., Klinck, H., ... Ewers, R. M. (2020b). Characterizing  
848 soundscapes across diverse ecosystems using a universal acoustic feature set. *Proceedings of the*  
849 *National Academy of Sciences*, *117*, 17049-17055.
- 850 Simmons, K. R., Eggleston, D. B., & Bohnenstiehl, D. W. R. (2021). Hurricane impacts on a coral reef soundscape.  
851 *PLoS ONE*, *16*(2 February 2021), 1–27. <https://doi.org/10.1371/journal.pone.0244599>
- 852 Sirami, C., Brotons, L., Burfield, I., Fonderflick, J., & Martin, J.-L. (2008). Is land abandonment having an impact  
853 on biodiversity? A meta-analytical approach to bird distribution changes in the north-western  
854 Mediterranean. *Biological Conservation*, *141*(2), 450–459.  
855 <https://doi.org/10.1016/j.biocon.2007.10.015>
- 856 Stan Development Team (2020). RStan: the R interface to Stan. R package version 2.21.2. <https://mc-stan.org/>
- 857 Suding, K. N., Lavorel, S., Chapin, F. S., Cornelissen, J. H. C., Díaz, S., Garnier, E., ... Navas, M. L. (2008). Scaling  
858 environmental change through the community-level: A trait-based response-and-effect framework for  
859 plants. *Global Change Biology*, *14*(5), 1125–1140. <https://doi.org/10.1111/j.1365-2486.2008.01557.x>
- 860 Sueur, J., Krause, B., & Farina, A. (2019). Climate Change Is Breaking Earth's Beat. *Trends in Ecology and*  
861 *Evolution*, *34*(11), 971–973. <https://doi.org/10.1016/j.tree.2019.07.014>
- 862 Takeuchi, K., Yoshioka, S.-I., & Fumoto, R. (1981). Land transformation on okinawa island, southwest Japan.  
863 *Geographical Reports of Tokyo Metropolitan University*, *16*, 113–129.
- 864 Testard, C., Larson, S. M., Watowich, M. M., Kaplinsky, C. H., Bernau, A., Faulder, M., ... Brent, L. J. N. (2021).  
865 Rhesus macaques build new social connections after a natural disaster. *Current Biology*, *31*(11), 2299-  
866 2309.e7. <https://doi.org/10.1016/j.cub.2021.03.029>
- 867 Tilman, D., Reich, P. B., & Knops, J. M. H. (2006). Biodiversity and ecosystem stability in a decade-long grassland  
868 experiment. *Nature*, *441*(7093), 629–632. <https://doi.org/10.1038/nature04742>
- 869 Toth, C. A., Pauli, B. P., McClure, C. J. W., Francis, C. D., Newman, P., Barber, J. R., & Fristrup, K. (2022). A  
870 stochastic simulation model for assessing the masking effects of road noise for wildlife, outdoor  
871 recreation, and bioacoustic monitoring. *Oecologia*, *199*(1), 217–228. [https://doi.org/10.1007/s00442-](https://doi.org/10.1007/s00442-022-05171-2)  
872 [022-05171-2](https://doi.org/10.1007/s00442-022-05171-2)

- 873 Uchida, K., & Ushimaru, A. (2014). Biodiversity declines due to abandonment and intensification of agricultural  
874 lands: Patterns and mechanisms. *Ecological Monographs*, *84*(4), 637–658. [https://doi.org/10.1890/13-](https://doi.org/10.1890/13-2170.1)  
875 2170.1
- 876 Van Parijs, S. M., Baumgartner, M., Cholewiak, D., Davis, G., Gedamke, J., Gerlach, D., ... Thompson, M. (2015).  
877 NEPAN: A US Northeast passive acoustic sensing network for monitoring, reducing threats and the  
878 conservation of marine animals. *Marine Technology Society Journal*, *49*, 70-86.
- 879 Vehtari, A., Gelman, A., & Gabry, J. (2017). Practical Bayesian model evaluation using leave-one-out cross-  
880 validation and WAIC. *Statistics and Computing*, *27*, 1413–1432.
- 881 Villanueva-Rivera, L. J., & Pijanowski, B. C. (2018). soundecology: Soundscape Ecology. R package version 1.3.3.  
882 <https://CRAN.R-project.org/package=soundecology>
- 883 Vogel, A., Manning, P., Cadotte, M. W., Cowles, J., Isbell, F., Jousset, A. L. C., ... Wagg, C. (2019). Lost in trait  
884 space: Species-poor communities are inflexible in properties that drive ecosystem functioning. In  
885 *Advances in Ecological Research* (1st ed., Vol. 61, p. 131). Elsevier Ltd.  
886 <https://doi.org/10.1016/bs.aecr.2019.06.002>
- 887 Vokurková, J., Motombi, F. N., Ferenc, M., Hořák, D., & Sedláček, O. (2018). Seasonality of vocal activity of a bird  
888 community in an Afrotropical lowland rain forest. *Journal of Tropical Ecology*, *34*, 53–64.  
889 <https://doi.org/10.1017/S0266467418000056>
- 890 Wang, S., Loreau, M., Arnoldi, J.-F., Fang, J., Rahman, K. Abd., Tao, S., & de Mazancourt, C. (2017). An  
891 invariability-area relationship sheds new light on the spatial scaling of ecological stability. *Nature*  
892 *Communications*, *8*(May), 15211–15211. <https://doi.org/10.1038/ncomms15211>
- 893 Wang, S., Loreau, M., de Mazancourt, C., Isbell, F., Beierkuhnlein, C., Connolly, J., ... Craven, D. (2021). Biotic  
894 homogenization destabilizes ecosystem functioning by decreasing spatial asynchrony. *Ecology*, *102*(6),  
895 1–10. <https://doi.org/10.1002/ecy.3332>
- 896 White, L., O'Connor, N. E., Yang, Q., Emmerson, M. C., & Donohue, I. (2020). Individual species provide  
897 multifaceted contributions to the stability of ecosystems. *Nature Ecology and Evolution*, *1*.  
898 <https://doi.org/10.1038/s41559-020-01315-w>
- 899 Wiley, J. W., & Wunderle, J. M. (1993). The effects of hurricanes on birds, with special reference to Caribbean  
900 islands. *Bird Conservation International*, *3*(4), 319–349. <https://doi.org/10.1017/S0959270900002598>

- 901 Willig, M. R., & Camilo, G. R. (1991). The Effect of Hurricane Hugo on Six Invertebrate Species in the Luquillo  
902 Experimental Forest of Puerto Rico. *Biotropica*, 23(4), 455–461. <https://doi.org/10.2307/2388266>
- 903 Yang, Q., Fowler, M. S., Jackson, A. L., & Donohue, I. (2019). The predictability of ecological stability in a noisy  
904 world. *Nature Ecology and Evolution*, 3(February), 31–33. <https://doi.org/10.1038/s41559-018-0794-x>
- 905 Zampieri, N. E., Pau, S., & Okamoto, D. K. (2020). The impact of Hurricane Michael on longleaf pine habitats in  
906 Florida. *Scientific Reports*, 10(1), 1–11. <https://doi.org/10.1038/s41598-020-65436-9>
- 907 Zelnik, Y. R., Arnoldi, J.-F., & Loreau, M. (2018). The Impact of Spatial and Temporal Dimensions of Disturbances  
908 on Ecosystem Stability. *Frontiers in Ecology and Evolution*, 6.  
909 <https://www.frontiersin.org/article/10.3389/fevo.2018.00224>
- 910 Zhang, Q., Hong, Y., Zou, F., Zhang, M., Lee, T. M., Song, X., & Rao, J. (2016). Avian responses to an extreme ice  
911 storm are determined by a combination of functional traits, behavioural adaptations and habitat  
912 modifications. *Scientific Reports*, 6(1), Article 1. <https://doi.org/10.1038/srep22344>
